# Supplementary material for: Synthesis, crystal structure, thermal behaviour and magnetic properties of a novel one-dimensional copper(II) complex containing neutral and deprotonated 3-hydroxypyridine ligands
Source: Royal Society of Chemistry journal article supplement (doi:10.1039/b004072j), 2000-01-01
Supplement: b004072j.doc [file b004072j.doc]

# Supplementary material for the paper

**Synthesis, crystal structure, thermal behaviour and magnetic properties of a novel one-dimensional copper(II) complex containing neutral and deprotonated 3-hydroxypyridine ligands**

**Oscar Castillo, Antonio Luque,* Sonia Iglesias, Pablo Vitoria and Pascual Román**

*Departamento de Química Inorgánica, Universidad del País Vasco, Apartado 644, E–48080, Bilbao, Spain. E-mail: qipluara@lg.ehu.es*

X-ray powder diffraction pattern of the compound at 373 K

X-ray powder diffraction pattern of the compound at 443 K

Thermal variation of the magnetic susceptibility for the thermal residue at 373 K
